# Supplementary material for: Cardiovascular Autonomic Neuropathy Predicts Higher HbA1c Variability in Subjects with Type 2 Diabetes Mellitus
Source: PubMed Central journal article supplement — Diabetes Metab J. 2018 Sep 28;42(6):496–512. doi: 10.4093/dmj.2018.0026 (PMC6300446; doi:10.4093/dmj.2018.0026), 2018-09-28
Supplement: dmj-42-496-s001.pdf [file dmj-42-496-s001.pdf]

**Supplementary Table 1.** Reference values of the CARTs and scoring system used in this study

| Test                              | Measurement          | Score      |                |              |
|-----------------------------------|----------------------|------------|----------------|--------------|
|                                   |                      | 0 (normal) | 1 (borderline) | 2 (abnormal) |
| HR response to deep breathing     | Maximum–minimum HR   | ≥ 15       | 11–14          | ≤ 10         |
| HR response to lying to standing  | 30:15 ratio          | ≥ 1.04     | 1.01–1.03      | ≤ 1.00       |
| HR response to Valsalva maneuver  | Valsalva ratio       | ≥ 1.21     | 1.11–1.20      | ≤ 1.10       |
| BP response to stand-up           | Fall in systolic BP  | ≤ 10       | 11–29          | ≥ 30         |
| BP response to sustained handgrip | Rise in diastolic BP | ≥ 16       | 11–15          | ≤ 10         |

CART, cardiovascular autonomic reflex test; HR, heart rate; BP, blood pressure.
