# Supplementary material for: Cardiovascular Autonomic Neuropathy Predicts Higher HbA1c Variability in Subjects with Type 2 Diabetes Mellitus
Source: PubMed Central journal article supplement — Diabetes Metab J. 2018 Sep 28;42(6):496–512. doi: 10.4093/dmj.2018.0026 (PMC6300446; doi:10.4093/dmj.2018.0026), 2018-09-28
Supplement: dmj-42-496-s002.pdf [file dmj-42-496-s002.pdf]

**Supplementary Table 2.** Baseline characteristics according to HbA1c-SD

| Characteristic                          | Lower HbA1c-SD ( <i>n</i> =341) | Higher HbA1c-SD ( <i>n</i> =340) | <i>P</i> value |
|-----------------------------------------|---------------------------------|----------------------------------|----------------|
| Age, yr                                 | 58.9±8.4                        | 56.1±10.1                        | <0.001         |
| Male sex                                | 205 (60.1)                      | 201 (59.1)                       | 0.790          |
| Duration of diabetes, yr                | 9.1±7.6                         | 10.1±7.9                         | 0.094          |
| Current smoker                          | 53 (15.5)                       | 69 (20.3)                        | 0.106          |
| BMI, kg/m <sup>2</sup>                  | 24.5±3.0                        | 25.2±3.3                         | 0.001          |
| WC, cm                                  | 85.6±8.2                        | 87.2±8.9                         | 0.017          |
| WHR                                     | 0.92±0.06                       | 0.93±0.06                        | 0.033          |
| Systolic BP, mm Hg                      | 128.6±15.1                      | 132.1±16.9                       | 0.004          |
| Diastolic BP, mm Hg                     | 81.5±8.4                        | 82.8±9.1                         | 0.031          |
| Heart rate, beats/min                   | 69.6±11.4                       | 72.9±13.1                        | <0.001         |
| Fasting glucose, mg/dL                  | 125.4±23.4                      | 140.7±44.2                       | <0.001         |
| Baseline HbA1c, %                       | 6.67±0.56                       | 7.43±1.29                        | <0.001         |
| Serum creatinine, mg/dL                 | 0.85±0.18                       | 0.85±0.20                        | 0.895          |
| eGFR (MDRD), mL/min/1.73 m <sup>2</sup> | 86.8±18.2                       | 87.4±19.6                        | 0.658          |
| Total cholesterol, mg/dL                | 162.6±28.0                      | 165.7±36.9                       | 0.208          |
| Triglyceride, mg/dL                     | 117.7±67.4                      | 139.4±108.9                      | 0.002          |
| HDL-C, mg/dL                            | 48.7±10.9                       | 47.5±12.0                        | 0.169          |
| LDL-C, mg/dL                            | 89.8±25.1                       | 92.4±29.4                        | 0.220          |
| Diabetic retinopathy                    | 71 (20.8)                       | 113 (33.2)                       | <0.001         |
| CAN severity                            |                                 |                                  | <0.001         |
| Normal CAN                              | 170 (49.9)                      | 124 (36.5)                       |                |
| Early CAN                               | 148 (43.4)                      | 170 (50.0)                       |                |
| Severe CAN                              | 23 (6.7)                        | 46 (13.5)                        |                |
| Previous CAD                            | 20 (5.9)                        | 35 (10.3)                        | 0.034          |
| Previous CVA                            | 29 (5.6)                        | 15 (4.4)                         | 0.487          |
| Diabetes treatment                      |                                 |                                  |                |
| Life style modification only            | 34 (10.0)                       | 8 (2.4)                          | <0.001         |
| OHA only                                | 275 (80.6)                      | 253 (74.4)                       | 0.051          |
| Insulin±OHA                             | 32 (9.4)                        | 79 (23.2)                        | <0.001         |
| Use of hypertension medication          | 182 (53.4)                      | 199 (58.5)                       | 0.175          |
| Use of statin                           | 208 (61.0)                      | 208 (61.2)                       | 0.962          |
| Use of antiplatelet                     | 205 (60.1)                      | 196 (57.6)                       | 0.512          |
| During follow-up                        |                                 |                                  |                |
| Follow-up period, yr                    | 5.4 (5.0–5.9)                   | 5.5 (4.9–6.0)                    | 0.580          |
| No. of HbA1c measurements               | 16.9±4.5                        | 19.3±4.9                         | <0.001         |
| Mean of serial HbA1c, %                 | 6.72±0.46                       | 7.39±0.79                        | <0.001         |
| HbA1c variability indices               |                                 |                                  |                |
| HbA1c-SD, %                             | 0.328±0.091                     | 0.799±0.340                      | <0.001         |
| HbA1c-CV, %                             | 4.871±1.290                     | 10.762±4.171                     | <0.001         |
| Adjusted-HbA1c-SD, %                    | 0.318±0.089                     | 0.776±0.330                      | <0.001         |

Values are presented as mean ± standard deviation, number (%), or median (interquartile range).

HbA1c, glycosylated hemoglobin; SD, standard deviation; BMI, body mass index; WC, waist circumference; WHR, waist-hip ratio; BP, blood pressure; eGFR, estimated glomerular filtration rate; MDRD, Modification of Diet in Renal Disease; HDL-C, high density lipoprotein cholesterol; LDL-C, low density lipoprotein cholesterol; CAN, cardiovascular autonomic neuropathy; CAD, coronary artery disease; CVA, cerebrovascular accident; OHA, oral hypoglycemic agent; CV, coefficient of variation.
