# Supplementary material for: Cardiovascular Autonomic Neuropathy Predicts Higher HbA1c Variability in Subjects with Type 2 Diabetes Mellitus
Source: PubMed Central journal article supplement — Diabetes Metab J. 2018 Sep 28;42(6):496–512. doi: 10.4093/dmj.2018.0026 (PMC6300446; doi:10.4093/dmj.2018.0026), 2018-09-28
Supplement: dmj-42-496-s003.pdf [file dmj-42-496-s003.pdf]

**Supplementary Table 3.** Risk factors associated with higher HbA1c-CV and adjusted-HbA1c-SD during follow-up

| Variable                                          | OR (95% CI)                   |                                |                                |
|---------------------------------------------------|-------------------------------|--------------------------------|--------------------------------|
|                                                   | Model 1                       | Model 2                        | Model 3                        |
| <b>Higher HbA1c-CV</b>                            |                               |                                |                                |
| Early CAN (vs. normal group)                      | 1.45 (1.04–2.00) <sup>a</sup> | 1.37 (0.96–1.95)               | 1.37 (0.96–1.96)               |
| Severe CAN (vs. normal group)                     | 2.66 (1.52–4.66) <sup>b</sup> | 2.09 (1.15–3.82) <sup>b</sup>  | 2.10 (1.13–3.91) <sup>a</sup>  |
| Age (per 1 yr increment)                          | 0.97 (0.95–0.98) <sup>b</sup> | 0.98 (0.96–1.00) <sup>a</sup>  | 0.97 (0.95–0.99) <sup>b</sup>  |
| Sex (male vs. female)                             | 1.16 (0.84–1.60)              | 1.02 (0.72–1.44)               | 1.08 (0.75–1.54)               |
| BMI (per 1 kg/m <sup>2</sup> increment)           | 1.06 (1.01–1.12) <sup>a</sup> | 1.05 (0.99–1.11)               | 1.04 (0.99–1.10)               |
| Duration of diabetes (per 1 yr increment)         |                               | 0.98 (0.96–1.01)               | 0.98 (0.95–1.00)               |
| Mean of serial HbA1c (per 1% increment)           |                               | 4.33 (3.06–6.22) <sup>b</sup>  | 4.21 (2.94–6.04) <sup>b</sup>  |
| Heart rate (per 1 beats/min increment)            |                               |                                | 1.02 (1.00–1.03) <sup>a</sup>  |
| eGFR (per 1 mL/min/1.73 m <sup>2</sup> increment) |                               |                                | 1.00 (0.99–1.01)               |
| Diabetic retinopathy (yes vs. no)                 |                               |                                | 1.75 (1.13–2.70) <sup>a</sup>  |
| Coronary artery disease (yes vs. no)              |                               |                                | 2.24 (1.16–4.30) <sup>a</sup>  |
| Diabetes treatment (insulin use vs. no)           |                               |                                | 0.82 (0.47–1.44)               |
| Hypertension medication (yes vs. no)              |                               |                                | 1.20 (0.83–1.74)               |
| <b>Higher adjusted-HbA1c-SD</b>                   |                               |                                |                                |
| Early CAN (vs. normal group)                      | 1.62 (1.17–2.26) <sup>b</sup> | 1.61 (1.10–2.35) <sup>a</sup>  | 1.61 (1.10–2.37) <sup>a</sup>  |
| Severe CAN (vs. normal group)                     | 3.13 (1.78–5.53) <sup>b</sup> | 2.55 (1.35–4.84) <sup>b</sup>  | 2.56 (1.34–5.02) <sup>b</sup>  |
| Age (per 1 yr increment)                          | 0.96 (0.95–0.98) <sup>b</sup> | 0.98 (0.95–1.00) <sup>a</sup>  | 0.96 (0.94–0.99) <sup>b</sup>  |
| Sex (male/female)                                 | 1.19 (0.86–1.65)              | 1.03 (0.71–1.49)               | 1.10 (0.75–1.60)               |
| BMI (per 1 kg/m <sup>2</sup> increment)           | 1.08 (1.02–1.14) <sup>b</sup> | 1.07 (1.01–1.13) <sup>a</sup>  | 1.06 (1.00–1.13)               |
| Duration of diabetes (per 1 yr increment)         |                               | 0.98 (0.95–1.01)               | 0.96 (0.94–0.99) <sup>a</sup>  |
| Mean of serial HbA1c (per 1% increment)           |                               | 8.69 (5.70–13.22) <sup>b</sup> | 8.54 (5.51–13.24) <sup>b</sup> |
| Heart rate (per 1 beats/min increment)            |                               |                                | 1.02 (1.00–1.03) <sup>a</sup>  |
| eGFR (per 1 mL/min/1.73 m <sup>2</sup> increment) |                               |                                | 1.00 (0.99–1.01)               |
| Diabetic retinopathy (yes vs. no)                 |                               |                                | 1.93 (1.21–3.09) <sup>b</sup>  |
| Coronary artery disease (yes vs. no)              |                               |                                | 2.01 (1.01–4.00) <sup>a</sup>  |
| Diabetes treatment (insulin use vs. no)           |                               |                                | 0.99 (0.54–1.81)               |
| Hypertension medication (yes vs. no)              |                               |                                | 1.39 (0.94–2.06)               |

Model 1: adjusted for age, sex, and BMI; Model 2: adjusted for model 1+diabetes duration and mean serial HbA1c; Model 3: adjusted for model 2+heart rate, eGFR, diabetic retinopathy, coronary artery disease, diabetes treatment (insulin use), and use of hypertension medication.

HbA1c, glycosylated hemoglobin; CV, coefficient of variation; SD, standard deviation; OR, odds ratio; CI, confidence interval; CAN, cardiovascular autonomic neuropathy; BMI, body mass index; eGFR, estimated glomerular filtration rate.

<sup>a</sup> $P < 0.05$ , <sup>b</sup> $P < 0.01$ .
