# Supplementary material for: Cardiovascular Autonomic Neuropathy Predicts Higher HbA1c Variability in Subjects with Type 2 Diabetes Mellitus
Source: PubMed Central journal article supplement — Diabetes Metab J. 2018 Sep 28;42(6):496–512. doi: 10.4093/dmj.2018.0026 (PMC6300446; doi:10.4093/dmj.2018.0026), 2018-09-28
Supplement: dmj-42-496-s005.pdf [file dmj-42-496-s005.pdf]

**Supplementary Table 5.** Risk factors associated with higher HbA1c variability during follow-up (CAN was staged using three parasympathetic CARTs)

| Variable                                          | OR (95% CI)                   |                                |                                |
|---------------------------------------------------|-------------------------------|--------------------------------|--------------------------------|
|                                                   | Model 1                       | Model 2                        | Model 3                        |
| <b>Higher HbA1c-SD</b>                            |                               |                                |                                |
| Early CAN (vs. normal group)                      | 1.32 (0.93–1.87)              | 1.37 (0.92–2.03)               | 1.40 (0.94–2.10)               |
| Definite CAN (vs. normal group)                   | 1.61 (1.06–2.44) <sup>a</sup> | 1.69 (1.05–2.73) <sup>a</sup>  | 1.76 (1.07–2.88) <sup>a</sup>  |
| Age (per 1 yr increment)                          | 0.97 (0.95–0.98) <sup>b</sup> | 0.98 (0.96–1.00)               | 0.97 (0.94–0.99) <sup>b</sup>  |
| Sex (male vs. female)                             | 1.20 (0.87–1.65)              | 1.01 (0.70–1.46)               | 1.08 (0.74–1.57)               |
| BMI (per 1 kg/m <sup>2</sup> increment)           | 1.08 (1.03–1.14) <sup>b</sup> | 1.07 (1.01–1.14) <sup>a</sup>  | 1.06 (1.00–1.13) <sup>a</sup>  |
| Duration of diabetes (per 1 yr increment)         |                               | 0.98 (0.95–1.01)               | 0.96 (0.93–0.99) <sup>a</sup>  |
| Mean of serial HbA1c (per 1% increment)           |                               | 8.54 (5.63–12.96) <sup>b</sup> | 8.41 (5.45–12.97) <sup>b</sup> |
| Heart rate (per 1 beats/min increment)            |                               |                                | 1.02 (1.00–1.03) <sup>a</sup>  |
| eGFR (per 1 mL/min/1.73 m <sup>2</sup> increment) |                               |                                | 1.00 (0.99–1.01)               |
| Diabetic retinopathy (yes vs. no)                 |                               |                                | 2.11 (1.33–3.35) <sup>b</sup>  |
| Coronary artery disease (yes vs. no)              |                               |                                | 1.99 (1.01–3.95) <sup>a</sup>  |
| Diabetes treatment (insulin use vs. no)           |                               |                                | 1.02 (0.56–1.87)               |
| Hypertension medication (yes vs. no)              |                               |                                | 1.35 (0.91–1.99)               |
| <b>Higher HbA1c-CV</b>                            |                               |                                |                                |
| Early CAN (vs. normal group)                      | 1.19 (0.84–1.68)              | 1.19 (0.82–1.72)               | 1.21 (0.83–1.77)               |
| Definite CAN (vs. normal group)                   | 1.41 (0.93–2.14)              | 1.38 (0.88–2.17)               | 1.41 (0.88–2.23)               |
| Age (per 1 yr increment)                          | 0.97 (0.95–0.99) <sup>b</sup> | 0.98 (0.96–1.00)               | 0.97 (0.95–0.99) <sup>a</sup>  |
| Sex (male vs. female)                             | 1.19 (0.86–1.64)              | 1.03 (0.73–1.46)               | 1.09 (0.76–1.56)               |
| BMI (per 1 kg/m <sup>2</sup> increment)           | 1.06 (1.01–1.12) <sup>a</sup> | 1.05 (0.99–1.10)               | 1.04 (0.98–1.10)               |
| Duration of diabetes (per 1 yr increment)         |                               | 0.99 (0.96–1.01)               | 0.98 (0.95–1.00)               |
| Mean of serial HbA1c (per 1% increment)           |                               | 4.42 (3.13–6.24) <sup>b</sup>  | 4.29 (3.00–6.13) <sup>b</sup>  |
| Heart rate (per 1 beats/min increment)            |                               |                                | 1.02 (1.00–1.03) <sup>a</sup>  |
| eGFR (per 1 mL/min/1.73 m <sup>2</sup> increment) |                               |                                | 1.00 (0.99–1.01)               |
| Diabetic retinopathy (yes vs. no)                 |                               |                                | 1.79 (1.16–2.75) <sup>b</sup>  |
| Coronary artery disease (yes vs. no)              |                               |                                | 2.24 (1.17–4.28) <sup>a</sup>  |
| Diabetes treatment (insulin use vs. no)           |                               |                                | 0.84 (0.48–1.47)               |
| Hypertension medication (yes vs. no)              |                               |                                | 1.19 (0.82–1.71)               |
| <b>Higher adjusted-HbA1c-SD</b>                   |                               |                                |                                |
| Early CAN (vs. normal group)                      | 1.30 (0.92–1.84)              | 1.34 (0.90–2.00)               | 1.37 (0.92–2.06)               |
| Definite CAN (vs. normal group)                   | 1.54 (1.02–2.34) <sup>a</sup> | 1.61 (1.00–2.60)               | 1.67 (1.02–2.74) <sup>a</sup>  |
| Age (per 1 yr increment)                          | 0.97 (0.95–0.98) <sup>b</sup> | 0.98 (0.96–1.00) <sup>a</sup>  | 0.97 (0.94–0.99) <sup>b</sup>  |
| Sex (male vs. female)                             | 1.22 (0.89–1.69)              | 1.04 (0.72–1.50)               | 1.11 (0.76–1.63)               |
| BMI (per 1 kg/m <sup>2</sup> increment)           | 1.08 (1.02–1.13) <sup>b</sup> | 1.07 (1.01–1.13) <sup>a</sup>  | 1.06 (1.00–1.13)               |
| Duration of diabetes (per 1 yr increment)         |                               | 0.98 (0.96–1.01)               | 0.96 (0.94–0.99) <sup>a</sup>  |
| Mean of serial HbA1c (per 1% increment)           |                               | 8.77 (5.77–13.35) <sup>b</sup> | 8.61 (5.57–13.32) <sup>b</sup> |
| Heart rate (per 1 beats/min increment)            |                               |                                | 1.02 (1.00–1.03) <sup>a</sup>  |
| eGFR (per 1 mL/min/1.73 m <sup>2</sup> increment) |                               |                                | 1.00 (0.99–1.01)               |
| Diabetic retinopathy (yes vs. no)                 |                               |                                | 1.98 (1.25–3.15) <sup>b</sup>  |
| Coronary artery disease (yes vs. no)              |                               |                                | 2.01 (1.02–3.99) <sup>a</sup>  |
| Diabetes treatment (insulin use vs. no)           |                               |                                | 1.02 (0.56–1.87)               |
| Hypertension medication (yes vs. no)              |                               |                                | 1.38 (0.93–2.04)               |

The CAN staging was defined as follows (1) one abnormal parasympathetic test result defined as early CAN; or (2) at least two abnormal parasympathetic function tests are defined as definite CAN. Model 1: adjusted for age, sex, and BMI; Model 2: adjusted for model 1+diabetes duration and mean serial HbA1c; Model 3: adjusted for model 2+heart rate, eGFR, diabetic retinopathy, coronary artery disease, diabetes treatment (insulin use), and use of hypertension medication.

HbA1c, glycosylated hemoglobin; CAN, cardiovascular autonomic neuropathy; CART, cardiovascular autonomic reflex test; OR, odds ratio; CI, confidence interval; SD, standard deviation; BMI, body mass index; eGFR, estimated glomerular filtration rate; CV, coefficient of variation.

<sup>a</sup> $P < 0.05$ , <sup>b</sup> $P < 0.01$ .
