# Supplementary material for: Cardiovascular Autonomic Neuropathy Predicts Higher HbA1c Variability in Subjects with Type 2 Diabetes Mellitus
Source: PubMed Central journal article supplement — Diabetes Metab J. 2018 Sep 28;42(6):496–512. doi: 10.4093/dmj.2018.0026 (PMC6300446; doi:10.4093/dmj.2018.0026), 2018-09-28
Supplement: dmj-42-496-s006.pdf [file dmj-42-496-s006.pdf]

**Supplementary Table 6.** The risk of developing higher HbA1c-CV or adjusted-HbA1c-SD in subgroups according to the mean HbA1c and diabetes duration

| Variable                        | OR (95% CI)                    |                               |                                |
|---------------------------------|--------------------------------|-------------------------------|--------------------------------|
|                                 | Model 1                        | Model 2                       | Model 3                        |
| <b>Higher HbA1c-CV</b>          |                                |                               |                                |
| Mean of serial HbA1c            |                                |                               |                                |
| <7% (n=360)                     |                                |                               |                                |
| Normal                          | 1 (reference)                  | 1 (reference)                 | 1 (reference)                  |
| Early CAN                       | 1.39 (0.87–2.22)               | 1.40 (0.87–2.26)              | 1.36 (0.84–2.21)               |
| Severe CAN                      | 2.43 (1.11–5.32) <sup>a</sup>  | 2.32 (1.05–5.15) <sup>a</sup> | 2.50 (1.09–5.70) <sup>a</sup>  |
| ≥7% (n=321)                     |                                |                               |                                |
| Normal                          | 1 (reference)                  | 1 (reference)                 | 1 (reference)                  |
| Early CAN                       | 1.47 (0.89–2.45)               | 1.27 (0.74–2.17)              | 1.31 (0.76–2.28)               |
| Severe CAN                      | 2.70 (1.13–6.48) <sup>a</sup>  | 1.75 (0.69–4.44)              | 1.66 (0.63–4.37)               |
| Duration of diabetes            |                                |                               |                                |
| ≤10 yr (n=434)                  |                                |                               |                                |
| Normal                          | 1 (reference)                  | 1 (reference)                 | 1 (reference)                  |
| Early CAN                       | 1.53 (1.02–2.32) <sup>a</sup>  | 1.48 (0.94–2.33)              | 1.44 (0.90–2.30)               |
| Severe CAN                      | 1.69 (0.76–3.76)               | 1.74 (0.73–4.13)              | 1.69 (0.70–4.13)               |
| >10 yr (n=247)                  |                                |                               |                                |
| Normal                          | 1 (reference)                  | 1 (reference)                 | 1 (reference)                  |
| Early CAN                       | 1.25 (0.71–2.20)               | 1.21 (0.67–2.16)              | 1.27 (0.70–2.32)               |
| Severe CAN                      | 3.48 (1.49–8.16) <sup>b</sup>  | 2.64 (1.09–6.38) <sup>a</sup> | 3.07 (1.22–7.73) <sup>a</sup>  |
| <b>Higher adjusted-HbA1c-SD</b> |                                |                               |                                |
| Mean of serial HbA1c            |                                |                               |                                |
| <7% (n=360)                     |                                |                               |                                |
| Normal                          | 1 (reference)                  | 1 (reference)                 | 1 (reference)                  |
| Early CAN                       | 1.67 (1.02–2.71) <sup>a</sup>  | 1.73 (1.04–2.86) <sup>a</sup> | 1.71 (1.02–2.88) <sup>a</sup>  |
| Severe CAN                      | 2.88 (1.29–6.41) <sup>a</sup>  | 2.80 (1.23–6.36) <sup>a</sup> | 2.90 (1.23–6.85) <sup>a</sup>  |
| ≥7% (n=321)                     |                                |                               |                                |
| Normal                          | 1 (reference)                  | 1 (reference)                 | 1 (reference)                  |
| Early CAN                       | 1.64 (0.97–2.78)               | 1.37 (0.77–2.46)              | 1.41 (0.77–2.56)               |
| Severe CAN                      | 3.49 (1.36–8.99) <sup>a</sup>  | 2.11 (0.74–5.98)              | 2.08 (0.70–6.19)               |
| Duration of diabetes            |                                |                               |                                |
| ≤10 yr (n=434)                  |                                |                               |                                |
| Normal                          | 1 (reference)                  | 1 (reference)                 | 1 (reference)                  |
| Early CAN                       | 1.73 (1.14–2.63) <sup>a</sup>  | 1.77 (1.09–2.87) <sup>a</sup> | 1.74 (1.05–2.87) <sup>a</sup>  |
| Severe CAN                      | 1.94 (0.87–4.35)               | 2.18 (0.88–5.41)              | 2.03 (0.79–5.23)               |
| >10 yr (n=247)                  |                                |                               |                                |
| Normal                          | 1 (reference)                  | 1 (reference)                 | 1 (reference)                  |
| Early CAN                       | 1.37 (0.78–2.42)               | 1.35 (0.72–2.51)              | 1.43 (0.75–2.71)               |
| Severe CAN                      | 4.21 (1.74–10.21) <sup>b</sup> | 3.01 (1.16–7.84) <sup>a</sup> | 3.84 (1.42–10.43) <sup>a</sup> |

Model 1: adjusted for age, sex, and body mass index; Model 2: adjusted for model 1+diabetes duration and mean serial HbA1c; Model 3: adjusted for model 2+heart rate, estimated glomerular filtration rate, diabetic retinopathy, coronary artery disease, diabetes treatment (insulin use), and use of hypertension medication.

HbA1c, glycosylated hemoglobin; CV, coefficient of variation; SD, standard deviation; OR, odds ratio; CI, confidence interval; CAN, cardiovascular autonomic neuropathy.

<sup>a</sup>P<0.05, <sup>b</sup>P<0.01.
